# Supplementary material for: Chitin based hybrid composites reinforced with graphene derivatives: a nanoscale study
Source: Royal Society of Chemistry journal article supplement (doi:10.1039/c5ra13563j), 2015-01-01
Supplement: c5ra13563j1.pdf [file c5ra13563j1.pdf]

## Chitin based hybrid composite reinforced with graphene derivatives: a nanoscale study

Joaquín Antonio González,<sup>a</sup> María Emilia Villanueva,<sup>a</sup> María Luz Peralta Ramos,<sup>a</sup> Claudio Javier Perez,<sup>b</sup> Ledia Leonor Piehl<sup>c</sup> and Guillermo Javier Copello\*<sup>a</sup>

<sup>a</sup>*Cátedra de Química Analítica Instrumental, Facultad de Farmacia y Bioquímica, Universidad de Buenos Aires (UBA), IQUIMEFA (UBA-CONICET), Junín 956, C1113AAD Buenos Aires, Argentina; Tel/fax: +54 11 49648254; E-mail: gcopello@ffyb.uba.ar*

<sup>b</sup>*Instituto en Investigaciones en Ciencia y Tecnologías de Materiales, Universidad de Mar del Plata, (CONICET), Juan B. Justo 4302, CP 7300 Mar del Plata, Argentina*

<sup>c</sup>*Cátedra de Física, Facultad de Farmacia y Bioquímica, Universidad de Buenos Aires (UBA), Junín 956, C1113AAD CABA, Argentina*

### Electronic Supplementary Information

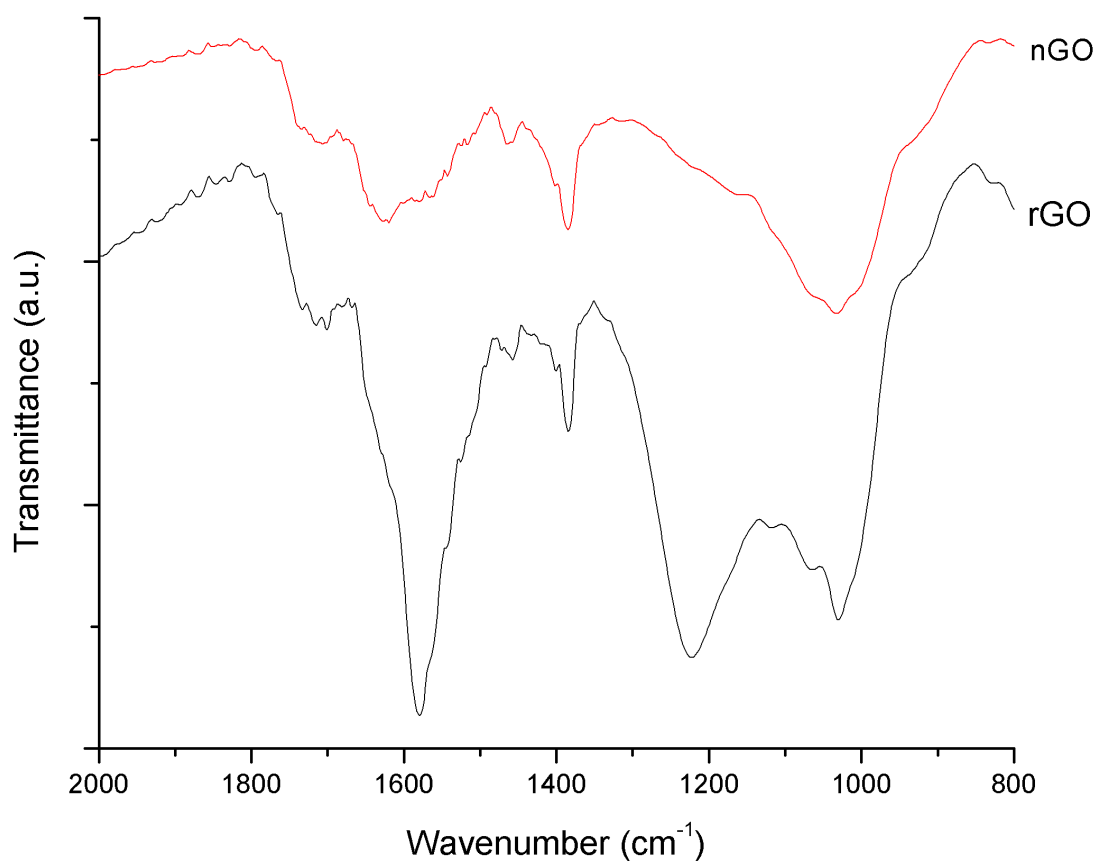

ESI 1: FT-IR of graphite, nGO and rGO.

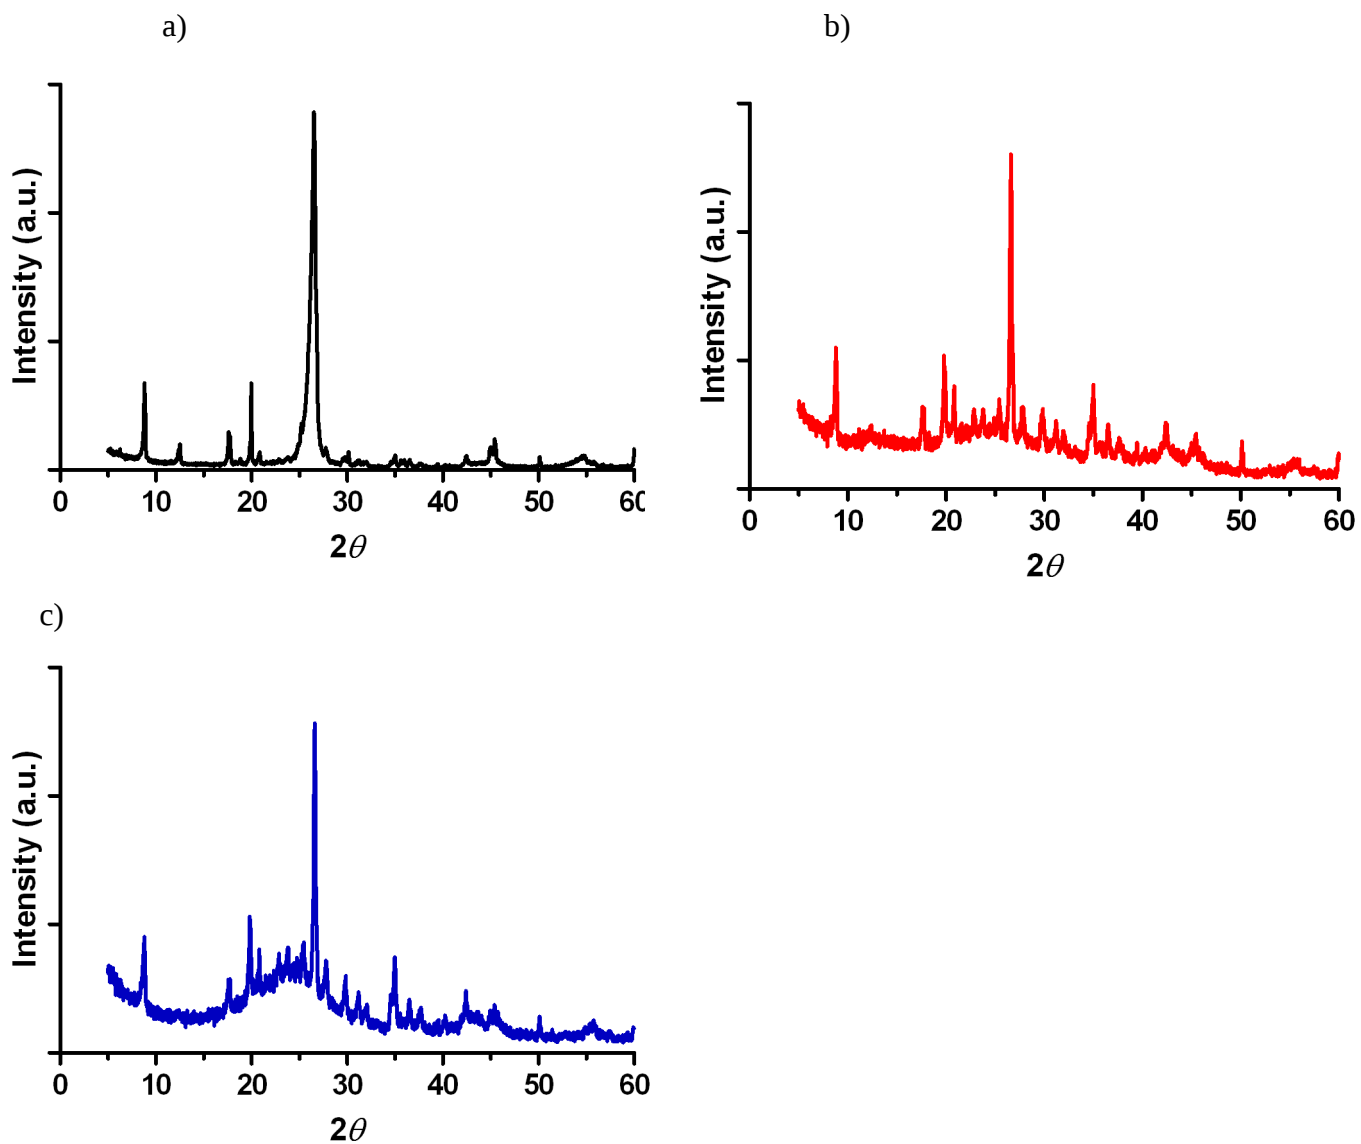

ESI 2: XRD patterns of (a) graphite, (b) nGO and (c) rGO

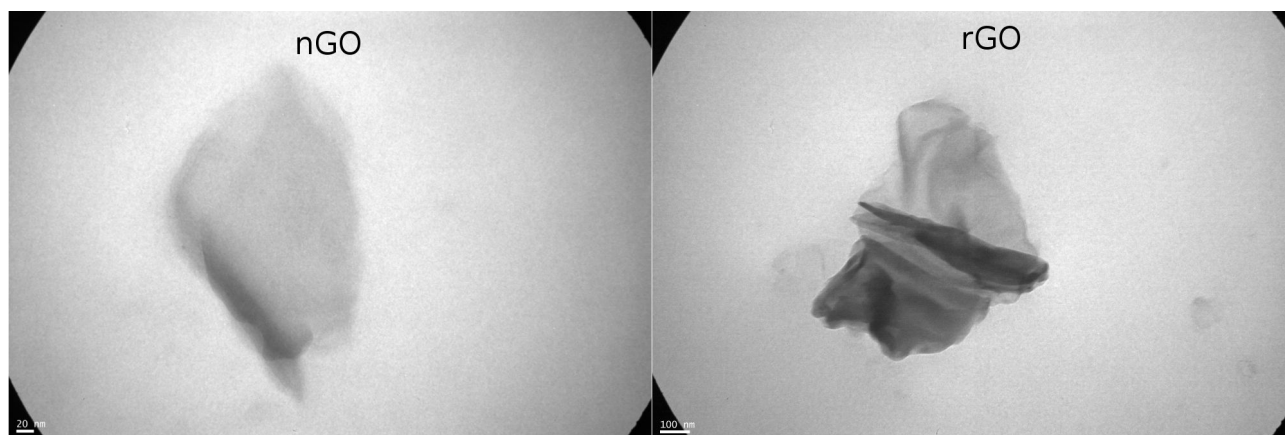

ESI 3: TEM images of the nanosheets

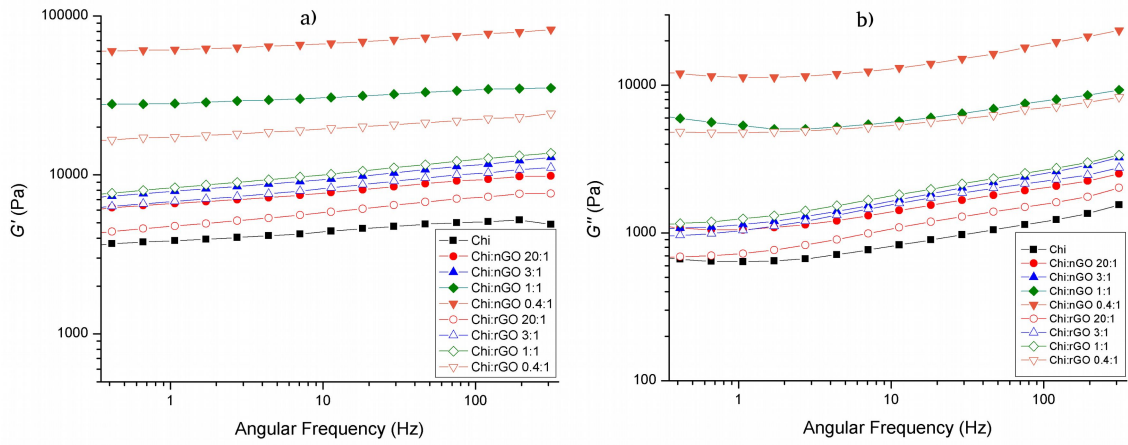

ESI 4: Storage modulus ( $G'$ ) (a) and loss modulus ( $G''$ ) (b) frequency dependent of the Chi:nGO and Chi:rGO hybrids.
